# Supplementary material for: Exploring the role of epidermal growth factor receptor variant III in meningeal tumors
Source: PubMed Central journal article supplement (PMC8478197; doi:10.1371/journal.pone.0255133), 2021-09-28
Supplement: pone.0255133.s001.pdf [file pone.0255133.s001.pdf]

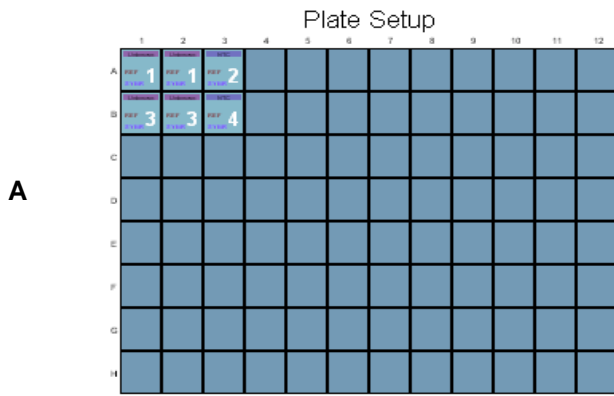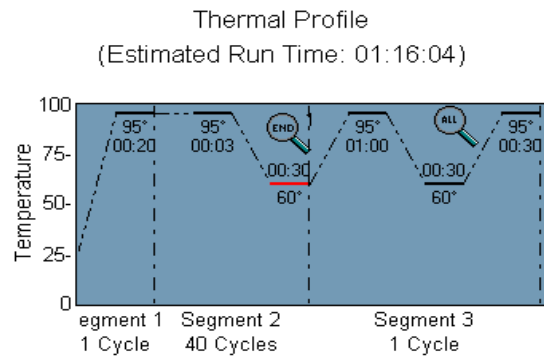

**Analysis Sel./Setup-Term Settings View**  
 Amplification-based threshold using search range of 5 to 60 percent.  
 Moving average points for amplification = 3, dissociation = 3.  
 Dissociation graphical temperature separation = 0.50.  
 Baseline Settings Plate: \* indicates manual baseline cycle range settings.

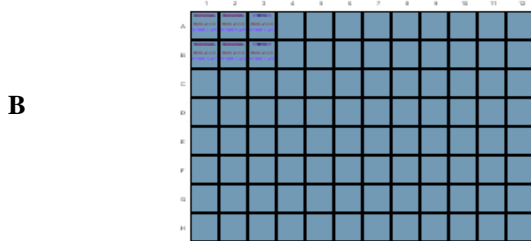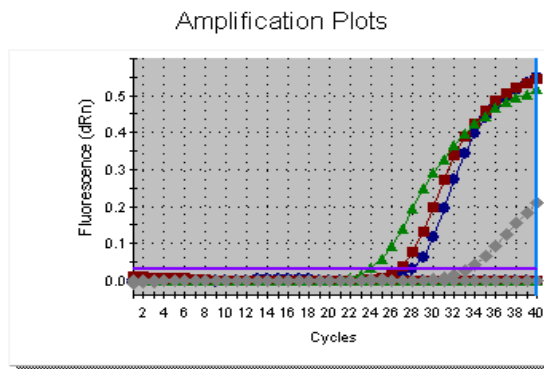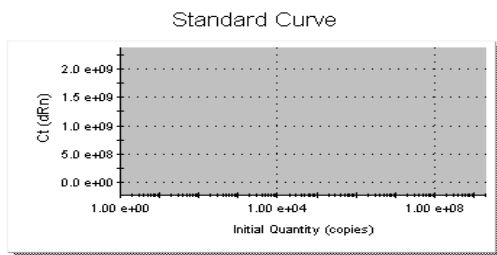

Some of the standard curves have not been displayed  
 SYBR had <2 unique standard wells with reference dye.

**C**

| Replicate | Well Type | Threshold (dRn) | Ct (dRn)  |
|-----------|-----------|-----------------|-----------|
| 1         | Unknown   | Reference       | Reference |
| 1         | Unknown   | 0,0293          | 26.01     |
| 2         | NTC       | Reference       | Reference |
| 2         | NTC       | 0,0293          | 26.68     |
| 3         | Unknown   | Reference       | Reference |
| 3         | Unknown   | 0,0293          | 23.86     |
| 4         | NTC       | Reference       | Reference |
| 4         | NTC       | 0,0293          | 33.31     |

Figure: S1

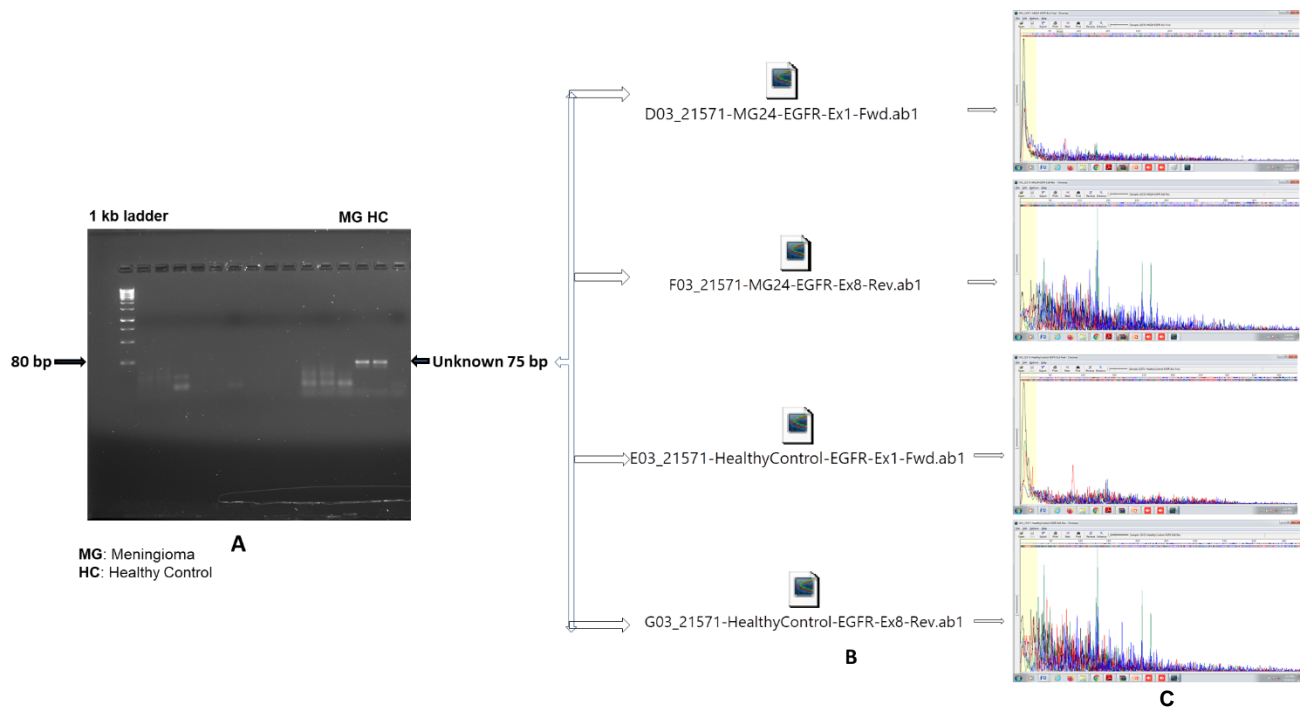

**Figure: S2**

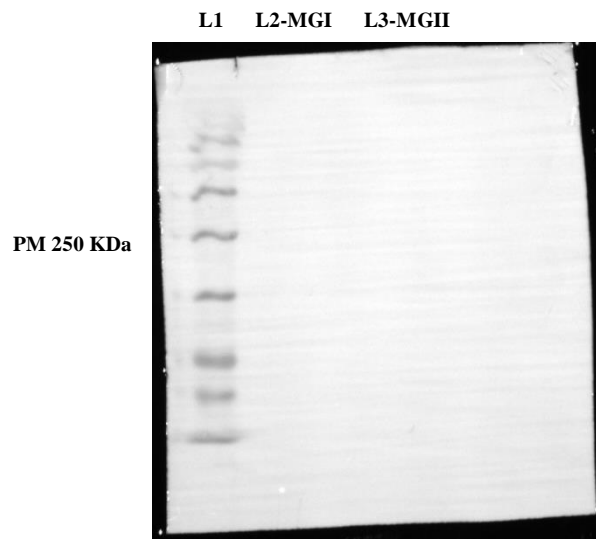

**Figure: S3**
